# Supplementary material
Source: publisher site journal article supplement (https://www.dovepress.com/get_supplementary_file.php?f=464498.docx)
Supplement: Supplementary file 1 [file get_supplementary_file.php]

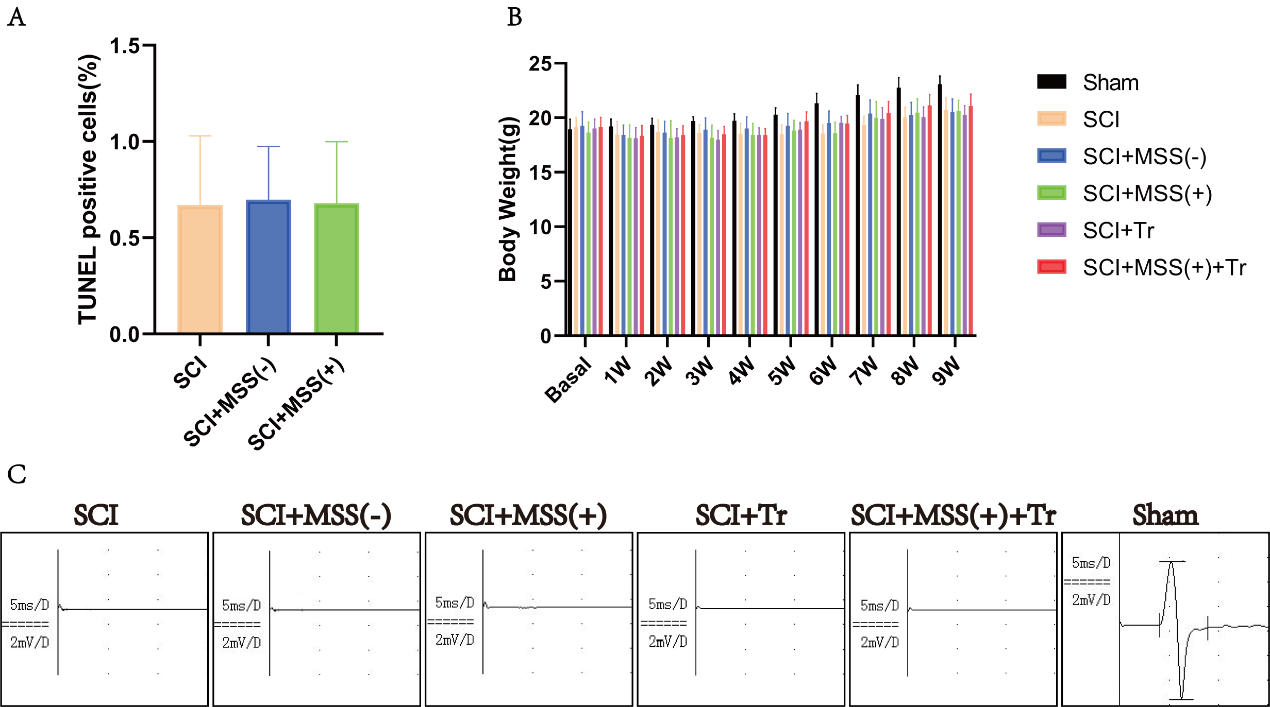


Supplementary Figure1. (A) Percentages (%) of TUNEL-positive cells relative to DAPI-positive total number of nuclei (n = 6 mice per group). (B) Body Weight was monitored in the different mouse groups (n = 10 mice per group at each time point). Two-way repeated-measures ANOVA with Fisher’s LSD. (C) Representative electromyogram signal of eliciting MEP in different group­­s one week after the spinal cord injury.
